# Supplementary material for: Pyruvate Accumulation Is the First Line of Cell Defense against Heat Stress in a Fungus
Source: PubMed Central journal article supplement (PMC5587913; doi:10.1128/mbio.01284-17), 2017-09-05
Supplement: mbo004173466st1.pdf [file mbo004173466st1.pdf]

**Table S1 The list of genes analyzed by qRT-PCR in this study**

| Functions                                                   | Gene Name | Function                                                                                 | Forward primer       | Reverse primer        |
|-------------------------------------------------------------|-----------|------------------------------------------------------------------------------------------|----------------------|-----------------------|
| Glycolysis                                                  | MAA_04209 | Hexokinase                                                                               | ATTCAAAGAACGTGGTGCC  | ATTGCCAGCCTTGACTCTCT  |
|                                                             | MAA_05057 | Hexokinase                                                                               | GTCACCTCAAGCCGCTACAG | CAACTCGGAATCTCTGACG   |
|                                                             | MAA_09075 | Phosphofruktokinase                                                                      | TGCCAACATTATCCGCGAG  | CTTCTTGACGCGGTATGGG   |
|                                                             | MAA_06851 | Pyruvate kinase                                                                          | TGCTGGTGAAACGGCAAAG  | CAATGATACCACCAGCAGCC  |
| Pyruvate permease                                           | MAA_02781 | Transport pyruvate from cytoplasm into mitochondria                                      | TCATCCCCATCCACCTCATG | TAGACGCAGCCCATGAAGAT  |
| Pyruvate dehydrogenase complex                              | MAA_08787 | Pyruvate dehydrogenase E1 component beta subunit                                         | GTCAACTCTGCCGGAAGAC  | CAGCCTTGAGAAGACCCTTG  |
|                                                             | MAA_03599 | Mitochondrial substrate carrier                                                          | GTTAACGGCATGGACGTCTT | CCTCACGGGTACGGTAGGTA  |
|                                                             | MAA_02750 | Pyruvate dehydrogenase complex                                                           | GTTGAGAACGATGATGGCAC | AGAAGCAGCTCAAGAGGGTT  |
| Tricarboxylic Acid Cycle (TCA cycle)                        | MAA_04490 | Dihydrolipoyl dehydrogenase( a subunit of $\alpha$ -ketoglutarate dehydrogenase complex) | TCTCGTCAAAATGCTTGCAG | CTTCCGCTAATGTTGGGTGT  |
|                                                             | MAA_01828 | Citrate synthase                                                                         | ACAAGAAGGAGTACTGGGGC | GGTTGGCGAAGTTGAAGGAG  |
|                                                             | MAA_03118 | Isocitrate dehydrogenase                                                                 | TAAGAATCCGGTCGTGGAAC | GTGACCTGGTCGTTGGTCTT  |
|                                                             | MAA_09446 | Malate dehydrogenase                                                                     | AAGGCCTAGTACCAAGGAC  | CAACCGAAGCCTTCAAAGCT  |
| Produce oxaloacetic acid(OAA)to supplement to the TCA cycle | MAA_04366 | Pyruvate carboxylase                                                                     | TCGGGAGATATGCTGAACCC | ACACCAGTACCAGCAGAGTC  |
| Acetaldehyde synthesis                                      | MAA_09838 | Thiamine pyrophosphate enzyme                                                            | CACGGGCTTGACATTGTGAT | TGTTACCTCGTCATTCCCA   |
| Fermentation ( lactate synthesis from pyruvate)             | MAA_09321 | Lactate dehydrogenase                                                                    | GTAATGTTCTGCCGTCAGC  | CCATCAGCAAGCACATGAGT  |
|                                                             | MAA_07000 | D-lactate dehydrogenase                                                                  | TGCCTACGACCCATTTCAT  | TATTACCAGCATCACCCCA   |
| Glyoxylate cycle                                            | MAA_01023 | Isocitrate lyase                                                                         | TACATTGACTACCTCCGGCC | CAGCCATAACGTCCTTATG   |
|                                                             | MAA_04402 | Isocitrate lyase                                                                         | CCGTCATGAAGTCAACCAAG | AGGTCCGTGCCATAATGTC   |
| Leu,Ile,Val synthesis                                       | MAA_07650 | Acetolactate synthase small subunit                                                      | AACTGCTCTCTCACCATCGT | ATGTCCAAAACCTTGCCACC  |
| ROS scavengers                                              | MAA_00836 | Superoxide dismutase                                                                     | GTCACCTTCGAGCAGGACTC | CGTGAGGGTTGAAGTGAGGT  |
|                                                             | MAA_02494 | Copper chaperone for superoxide dismutase                                                | GAGGCTCTGCCTTGTGTGAC | TCCTCCCACAGTGTCTTCC   |
|                                                             | MAA_04749 | Iron superoxide dismutase                                                                | CGGATCGTGACTACCAAGGA | GAACACATCATCGGTCCTC   |
|                                                             | MAA_10313 | Cu/Zn superoxide dismutase                                                               | ATAGCAGGGCCAAGGATTCC | GTGATCTCTGCTTGTTCGC   |
|                                                             | MAA_04142 | Cu/Zn superoxide dismutase                                                               | GCGATTGAGAAGTTCGCCA  | ACAATGAAGGGTCTGATGT   |
|                                                             | MAA_04372 | Fe superoxide dismutase                                                                  | AAGAACCAGGTCTACGGCAG | GGCAACCTTTTCCAGTCAA   |
|                                                             | MAA_05433 | Manganese/iron superoxide dismutase                                                      | CTCTTGCTACTCGTCCCAAC | AGTGCTCCAGTGTGATGACCT |
|                                                             | MAA_05879 | Catalase                                                                                 | ATCAACAGACCCGTTGTTC  | GTGAAGAAGCCTTGTCCCTTG |
|                                                             | MAA_10436 | Catalase                                                                                 | ACTTTCAACTTCCGCGAAC  | TCCCCGTCCACATTTTCATGA |
|                                                             | MAA_10327 | Peroxisomal catalase                                                                     | CGATATTGGGGCACTGAAGC | ACGGGTTCAGATCTCTTIG   |
|                                                             | MAA_09564 | Catalase                                                                                 | CGATTGTCTCCCTCAACAG  | CGTACGTCCTGAAGCCCATG  |
|                                                             | MAA_06740 | Catalase                                                                                 | TCCACTGGTTCCTGTATCC  | GCATCTTCCGGGTCAATGAC  |
|                                                             | MAA_05785 | Catalase                                                                                 | GAGATGGTGGCATGGTTGTC | CGTCACATCGCCAAAGAGAG  |
|                                                             | MAA_05543 | Catalase                                                                                 | GTGACGGAGGAGACTTTGA  | TCGACCCGACTAAACAACGA  |

|                     |           |                               |                      |                       |
|---------------------|-----------|-------------------------------|----------------------|-----------------------|
|                     | MAA_03203 | Catalase                      | GTTTGGCCACCTCAAGACTG | GCACAACCTCCTCAAGCTC   |
|                     | MAA_01261 | Catalase                      | ATTGCCCATTCCTTCAACGG | CTGCCTGTTCAAAATCCGCT  |
|                     | MAA_06893 | Peroxiredoxins                | TGACCCCAAGAAGACCATCC | CTTGATGATGCGGAGGTTGG  |
|                     | MAA_01511 | Glutathione peroxidase        | GTACCCCGATGACTTCACCA | CCATTCTGTACAAGTCGCTGG |
| TRX-TRR & GRX-GLR   | MAA_09053 | Thioredoxin                   | TGCCGATGGTCTCTCAAGA  | CTCTGCGGCGCTTTATGAAT  |
|                     | MAA_04990 | Thioredoxin-like fold protein | CAGGTTCGGTGGTAAAACGG | GGTTCTCAGCGTCTCGTAGT  |
|                     | MAA_00709 | Thioredoxin reductase         | ACCGTCACAAAGCTAGACCT | AGATGCCGTTTTGCCAGTAC  |
|                     | MAA_02039 | Glutathione S-transferase     | ATTGACCAGTCCCGTCCAT  | CCGTATTGCTTCTTGGCCTC  |
|                     | MAA_04710 | Glutathione S-transferase     | CGTACTTTGGCCAGCTCATC | GGGACAAACATGAGATCGGC  |
| Heat shock proteins | MAA_03832 | HSP (Heat shock protein)      | AGGTCCTGCAGCTCATTCT  | CGGCAAACCTCGTAGTCATG  |
|                     | MAA_10381 | HSP (Heat shock protein)      | CGCCCAAATAAAGGAGCCAG | TAACGGCACCTGATCAACT   |
|                     | MAA_07190 | HSP (Heat shock protein)      | ACATTGAATCACCGAGCCG  | CAGTACTTGACTTGGCCG    |
